# Supplementary material for: Gelsolin Induces Colorectal Tumor Cell Invasion via Modulation of the Urokinase-Type Plasminogen Activator Cascade
Source: PubMed Central journal article supplement (PMC3424201; doi:10.1371/journal.pone.0043594), 2012-08-21
Supplement: pone.0043594.s007.pdf [file pone.0043594.s007.pdf]

| Cell Differentiation  |                                                                                                                    |                   |
|-----------------------|--------------------------------------------------------------------------------------------------------------------|-------------------|
| Genbank Accession no. | Protein Name                                                                                                       | Ave Fold $\Delta$ |
| ILMN_13615            | <a href="#">E74-like factor 3 (ets domain transcription factor, epithelial-specific)</a>                           | 2.80              |
| ILMN_21869            | <a href="#">EPH receptor A4</a>                                                                                    | 2.58              |
| ILMN_5986             | <a href="#">G protein-coupled receptor 183</a>                                                                     | -2.15             |
| ILMN_5586             | <a href="#">KIT ligand</a>                                                                                         | -2.57             |
| ILMN_8384             | <a href="#">PR domain containing 1, with ZNF domain</a>                                                            | -2.43             |
| ILMN_19136            | <a href="#">RAN, member RAS oncogene family</a>                                                                    | -2.69             |
| ILMN_15630            | <a href="#">SATB homeobox 2</a>                                                                                    | -2.25             |
| ILMN_5130             | <a href="#">SH2B adaptor protein 3</a>                                                                             | -4.36             |
| ILMN_1046             | <a href="#">TIMP metalloproteinase inhibitor 2</a>                                                                 | 4.25              |
| ILMN_28887            | <a href="#">Zic family member 2 (odd-paired homolog, Drosophila)</a>                                               | -2.25             |
| ILMN_23272            | <a href="#">amyloid beta (A4) precursor protein</a>                                                                | 2.19              |
| ILMN_18802            | <a href="#">angiopoietin 2</a>                                                                                     | -40.43            |
| ILMN_20440            | <a href="#">angiopoietin-like 4</a>                                                                                | -2.05             |
| ILMN_27187            | <a href="#">bone morphogenetic protein 4</a>                                                                       | -3.20             |
| ILMN_7507, ILMN_28609 | <a href="#">brain-derived neurotrophic factor</a>                                                                  | 7.39              |
| ILMN_1624             | <a href="#">caveolin 1, caveolae protein, 22kDa</a>                                                                | 3.05              |
| ILMN_5108             | <a href="#">caveolin 2</a>                                                                                         | 2.86              |
| ILMN_3374             | <a href="#">connective tissue growth factor</a>                                                                    | 3.35              |
| ILMN_3062             | <a href="#">cyclin-dependent kinase 6</a>                                                                          | -2.36             |
| ILMN_10501            | <a href="#">cystatin A (stefin A)</a>                                                                              | -7.48             |
| ILMN_21296            | <a href="#">cytochrome P450, family 24, subfamily A, polypeptide 1</a>                                             | -17.96            |
| ILMN_27871            | <a href="#">dedicator of cytokinesis 7</a>                                                                         | -22.54            |
| ILMN_5440             | <a href="#">dual specificity phosphatase 6</a>                                                                     | -5.84             |
| ILMN_10721            | <a href="#">early growth response 2</a>                                                                            | -2.67             |
| ILMN_3827             | <a href="#">ephrin-B2</a>                                                                                          | -2.44             |
| ILMN_15615            | <a href="#">epidermal growth factor receptor (erythroblastic leukemia viral (v-erb-b) oncogene homolog, avian)</a> | 2.23              |
| ILMN_17131            | <a href="#">epiregulin</a>                                                                                         | -2.63             |
| ILMN_25097            | <a href="#">epithelial membrane protein 1</a>                                                                      | 3.82              |
| ILMN_16913            | <a href="#">ets homologous factor</a>                                                                              | 5.02              |
| ILMN_18897            | <a href="#">fibroblast growth factor 19</a>                                                                        | -2.23             |
| ILMN_1771             | <a href="#">fibroblast growth factor 9 (glia-activating factor)</a>                                                | -3.80             |
| ILMN_21371            | <a href="#">filamin B, beta (actin binding protein 278)</a>                                                        | 6.82              |
| ILMN_23624            | <a href="#">forkhead box C1</a>                                                                                    | -3.12             |
| ILMN_22730,           |                                                                                                                    |                   |
| ILMN_11197            | <a href="#">glutaredoxin 2</a>                                                                                     | -2.11             |
| ILMN_18641            | <a href="#">hairy/enhancer-of-split related with YRPW motif 1</a>                                                  | -2.36             |
| ILMN_6829             | <a href="#">inhibitor of DNA binding 3, dominant negative helix-loop-helix protein</a>                             | -3.22             |
| ILMN_25529            | <a href="#">insulin-like growth factor binding protein 3</a>                                                       | 3.05              |

| Cell Differentiation (Continued) |                                                                                                                                       |                   |
|----------------------------------|---------------------------------------------------------------------------------------------------------------------------------------|-------------------|
| Genbank Accession no.            | Protein Name                                                                                                                          | Ave Fold $\Delta$ |
| ILMN_12662                       | <a href="#">integrin, alpha 2 (CD49B, alpha 2 subunit of VLA-2 receptor)</a>                                                          | -4.25             |
| ILMN_6529                        | <a href="#">keratin 19</a>                                                                                                            | 3.35              |
| ILMN_4021                        | <a href="#">laminin, alpha 4</a>                                                                                                      | -2.48             |
| ILMN_7322                        | <a href="#">laminin, beta 1</a>                                                                                                       | -4.95             |
| ILMN_3286                        | <a href="#">microtubule-actin crosslinking factor 1</a>                                                                               | -2.12             |
| ILMN_28251, ILMN_9993            | <a href="#">microtubule-associated protein 1B</a>                                                                                     | 3.00              |
| ILMN_3041, ILMN_10370            | <a href="#">myelin basic protein</a>                                                                                                  | 2.50              |
| ILMN_26696                       | <a href="#">myosin, light chain 2, regulatory, cardiac, slow</a>                                                                      | 2.08              |
| ILMN_26971                       | <a href="#">neuronal guanine nucleotide exchange factor</a>                                                                           | 2.17              |
| ILMN_17483                       | <a href="#">neuropilin 1</a>                                                                                                          | -2.77             |
| ILMN_7200                        | <a href="#">nuclear receptor subfamily 2, group F, member 1</a>                                                                       | -6.66             |
| ILMN_28405                       | <a href="#">nuclear receptor subfamily 4, group A, member 2</a>                                                                       | -2.58             |
| ILMN_17074                       | <a href="#">ovo-like 2 (Drosophila)</a>                                                                                               | -2.45             |
| ILMN_19894                       | <a href="#">parathyroid hormone 1 receptor</a>                                                                                        | 2.06              |
| ILMN_6504                        | <a href="#">periplakin</a>                                                                                                            | 2.68              |
| ILMN_7980                        | <a href="#">peroxisome proliferator-activated receptor gamma</a>                                                                      | -2.01             |
| ILMN_5923                        | <a href="#">phosphoinositide-3-kinase, regulatory subunit 1 (alpha)</a>                                                               | 2.62              |
| ILMN_27588                       | <a href="#">pre-B-cell leukemia homeobox 1</a>                                                                                        | 2.33              |
| ILMN_15492                       | <a href="#">proprotein convertase subtilisin/kexin type 9</a>                                                                         | 2.02              |
| ILMN_18896                       | <a href="#">protein tyrosine phosphatase, receptor type, F</a>                                                                        | 2.02              |
| ILMN_24484                       | <a href="#">sema domain, immunoglobulin domain (Ig), short basic domain, secreted, (semaphorin) 3A</a>                                | -81.44            |
| ILMN_29382                       | <a href="#">sema domain, immunoglobulin domain (Ig), short basic domain, secreted, (semaphorin) 3C</a>                                | 2.03              |
| ILMN_25026                       | <a href="#">sema domain, immunoglobulin domain (Ig), transmembrane domain (TM) and short cytoplasmic domain, (semaphorin) 4B</a>      | 2.33              |
| ILMN_11282                       | <a href="#">sema domain, transmembrane domain (TM), and cytoplasmic domain, (semaphorin) 6A</a>                                       | 2.79              |
| ILMN_28730                       | <a href="#">similar to protein kinase, DNA-activated, catalytic polypeptide; protein kinase, DNA-activated, catalytic polypeptide</a> | 2.39              |
| ILMN_17250                       | <a href="#">solute carrier family 1 (glial high affinity glutamate transporter), member 3</a>                                         | 2.53              |
| ILMN_11307                       | <a href="#">sortilin 1</a>                                                                                                            | -2.03             |
| ILMN_5286                        | <a href="#">tetratricopeptide repeat domain 3; tetratricopeptide repeat domain 3-like</a>                                             | 3.54              |
| ILMN_16372                       | <a href="#">tumor necrosis factor, alpha-induced protein 2</a>                                                                        | 2.18              |
| ILMN_9324                        | <a href="#">twist homolog 1 (Drosophila)</a>                                                                                          | 2.20              |
| ILMN_25778                       | <a href="#">versican</a>                                                                                                              | 2.82              |
| ILMN_21728                       | <a href="#">wingless-type MMTV integration site family, member 3A</a>                                                                 | -2.25             |
| Regulation of Transcription      |                                                                                                                                       |                   |
| Genbank Accession no.            | Protein Name                                                                                                                          | Ave Fold $\Delta$ |
| ILMN_17477                       | <a href="#">AT rich interactive domain 5B (MRF1-like)</a>                                                                             | 2.48              |
| ILMN_2259                        | <a href="#">CCR4-NOT transcription complex, subunit 1</a>                                                                             | -2.02             |
| ILMN_20291                       | <a href="#">CREB/ATF bZIP transcription factor</a>                                                                                    | 2.25              |
| ILMN_1724                        | <a href="#">D site of albumin promoter (albumin D-box) binding protein</a>                                                            | 3.16              |

| Regulation of Transcription ( <i>Continued</i> ) |                                                                                                                                                               |                   |
|--------------------------------------------------|---------------------------------------------------------------------------------------------------------------------------------------------------------------|-------------------|
| Genbank Accession no.                            | Protein Name                                                                                                                                                  | Ave Fold $\Delta$ |
| ILMN_19730                                       | <a href="#">E2F transcription factor 2</a>                                                                                                                    | -2.34             |
| ILMN_24725                                       | <a href="#">E2F transcription factor 8</a>                                                                                                                    | -2.02             |
| ILMN_13615                                       | <a href="#">E74-like factor 3 (ets domain transcription factor, epithelial-specific)</a>                                                                      | 2.80              |
| ILMN_8384                                        | <a href="#">PR domain containing 1, with ZNF domain</a>                                                                                                       | -2.43             |
| ILMN_4347                                        | <a href="#">SERTA domain containing 2</a>                                                                                                                     | 2.96              |
| ILMN_10011                                       | <a href="#">SMAD family member 7</a>                                                                                                                          | -2.23             |
| ILMN_17156                                       | <a href="#">TH1-like (Drosophila)</a>                                                                                                                         | -2.01             |
| ILMN_24821                                       | <a href="#">activating signal cointegrator 1 complex subunit 1</a>                                                                                            | -2.36             |
| ILMN_6018                                        | <a href="#">activating signal cointegrator 1 complex subunit 3</a>                                                                                            | 2.05              |
| ILMN_1659                                        | <a href="#">apolipoprotein B mRNA editing enzyme, catalytic polypeptide-like 3F</a>                                                                           | 2.18              |
| ILMN_15884                                       | <a href="#">apolipoprotein B mRNA editing enzyme, catalytic polypeptide-like 3G</a>                                                                           | 2.10              |
| ILMN_7180                                        | <a href="#">basic leucine zipper transcription factor, ATF-like 3</a>                                                                                         | -2.26             |
| ILMN_2684, ILMN_30355                            | <a href="#">cyclin-dependent kinase inhibitor 2A (melanoma, p16, inhibits CDK4)</a>                                                                           | -2.52             |
| ILMN_6524                                        | <a href="#">cysteine-serine-rich nuclear protein 1</a>                                                                                                        | -2.22             |
| ILMN_10721                                       | <a href="#">early growth response 2</a>                                                                                                                       | -2.67             |
| ILMN_25740                                       | <a href="#">enhancer of zeste homolog 2 (Drosophila)</a>                                                                                                      | -2.37             |
| ILMN_17131                                       | <a href="#">epiregulin</a>                                                                                                                                    | -2.63             |
| ILMN_16913                                       | <a href="#">ets homologous factor</a>                                                                                                                         | 5.02              |
| ILMN_23624                                       | <a href="#">forkhead box C1</a>                                                                                                                               | -3.12             |
| ILMN_138374                                      | <a href="#">forkhead box D1</a>                                                                                                                               | -2.29             |
| ILMN_10159                                       | <a href="#">forkhead box N2</a>                                                                                                                               | 2.23              |
| ILMN_9965                                        | <a href="#">forkhead box Q1</a>                                                                                                                               | 2.26              |
| ILMN_18641                                       | <a href="#">hairy/enhancer-of-split related with YRPW motif 1</a>                                                                                             | -2.36             |
| ILMN_15541                                       | <a href="#">homeobox C4</a>                                                                                                                                   | 2.55              |
| ILMN_4115                                        | <a href="#">interferon regulatory factor 7</a>                                                                                                                | 3.95              |
| ILMN_4335                                        | <a href="#">mediator complex subunit 22</a>                                                                                                                   | 2.00              |
| ILMN_137891                                      | <a href="#">msh homeobox 1</a>                                                                                                                                | -3.03             |
| ILMN_10519                                       | <a href="#">nuclear receptor coactivator 3</a>                                                                                                                | 2.17              |
| ILMN_7200                                        | <a href="#">nuclear receptor subfamily 2, group F, member 1</a>                                                                                               | -6.66             |
| ILMN_28405                                       | <a href="#">nuclear receptor subfamily 4, group A, member 2</a>                                                                                               | -2.58             |
| ILMN_804                                         | <a href="#">nuclear receptor subfamily 4, group A, member 3</a>                                                                                               | -2.33             |
| ILMN_30051                                       | <a href="#">nucleosomal binding protein 1</a>                                                                                                                 | 2.50              |
| ILMN_17074                                       | <a href="#">ovo-like 2 (Drosophila)</a>                                                                                                                       | -2.45             |
| ILMN_10778                                       | <a href="#">peroxisomal proliferator-activated receptor A interacting complex 285</a>                                                                         | 2.23              |
| ILMN_7980                                        | <a href="#">peroxisome proliferator-activated receptor gamma</a>                                                                                              | -2.01             |
| ILMN_27588                                       | <a href="#">pre-B-cell leukemia homeobox 1</a>                                                                                                                | 2.33              |
| ILMN_10669                                       | <a href="#">similar to transducin-like enhancer of split 1 (E(sp1) homolog, Drosophila); transducin-like enhancer of split 1 (E(sp1) homolog, Drosophila)</a> | 2.33              |
| ILMN_9797                                        | <a href="#">splicing factor, arginine/serine-rich 8 (suppressor-of-white-apricot homolog, Drosophila)</a>                                                     | -2.03             |
| ILMN_18876                                       | <a href="#">transcription factor AP-2 alpha (activating enhancer binding protein 2 alpha)</a>                                                                 | 4.11              |
| ILMN_24479                                       | <a href="#">tripartite motif-containing 24</a>                                                                                                                | 2.29              |

| Regulation of Transcription (Continued) |                                                                                                           |            |
|-----------------------------------------|-----------------------------------------------------------------------------------------------------------|------------|
| Genbank Accession no.                   | Protein Name                                                                                              | Ave Fold Δ |
| ILMN_9324                               | <a href="#">twist homolog 1 (Drosophila)</a>                                                              | 2.20       |
| ILMN_5708                               | <a href="#">v-ets erythroblastosis virus E26 oncogene homolog 1 (avian)</a>                               | 2.80       |
| ILMN_13830                              | <a href="#">vacuolar protein sorting 36 homolog (S. cerevisiae)</a>                                       | 2.86       |
| ILMN_9797                               | <a href="#">splicing factor, arginine/serine-rich 8 (suppressor-of-white-apricot homolog, Drosophila)</a> | -2.03      |
| ILMN_18876                              | <a href="#">transcription factor AP-2 alpha (activating enhancer binding protein 2 alpha)</a>             | 4.11       |
| ILMN_24479                              | <a href="#">tripartite motif-containing 24</a>                                                            | 2.29       |
| ILMN_9324                               | <a href="#">twist homolog 1 (Drosophila)</a>                                                              | 2.20       |
| ILMN_5708                               | <a href="#">v-ets erythroblastosis virus E26 oncogene homolog 1 (avian)</a>                               | 2.80       |
| ILMN_13830                              | <a href="#">vacuolar protein sorting 36 homolog (S. cerevisiae)</a>                                       | 2.86       |
| ILMN_10297                              | <a href="#">zinc finger protein 20</a>                                                                    | 2.47       |
| ILMN_12055                              | <a href="#">zinc finger protein 266</a>                                                                   | 2.70       |
| ILMN_17231                              | <a href="#">zinc finger protein 395</a>                                                                   | 3.12       |
| ILMN_2849                               | <a href="#">zinc finger protein 419</a>                                                                   | 2.12       |
| ILMN_13082                              | <a href="#">zinc finger protein 426</a>                                                                   | -2.02      |
| ILMN_22117                              | <a href="#">zinc finger protein 45</a>                                                                    | 2.50       |
| ILMN_24422                              | <a href="#">zinc finger protein 702 pseudogene</a>                                                        | 2.62       |
| ILMN_15160                              | <a href="#">zinc finger protein 816A</a>                                                                  | 2.50       |
| ILMN_23108                              | <a href="#">zinc finger protein 83</a>                                                                    | 2.91       |
| ILMN_6363                               | <a href="#">zinc finger protein 84</a>                                                                    | 2.82       |
| ILMN_13294                              | <a href="#">zinc finger protein 91</a>                                                                    | 2.18       |
| Regulation of Cell Communication        |                                                                                                           |            |
| Genbank Accession no.                   | Protein Name                                                                                              | Ave Fold Δ |
| ILMN_12195                              | <a href="#">6-phosphofructo-2-kinase/fructose-2,6-biphosphatase 2</a>                                     | 2.32       |
| ILMN_8233                               | <a href="#">ArfGAP with SH3 domain, ankyrin repeat and PH domain 2</a>                                    | 2.07       |
| ILMN_20228                              | <a href="#">DNA-damage-inducible transcript 4-like</a>                                                    | -2.24      |
| ILMN_4727                               | <a href="#">FYVE, RhoGEF and PH domain containing 6</a>                                                   | 2.07       |
| ILMN_5586                               | <a href="#">KIT ligand</a>                                                                                | -2.57      |
| ILMN_21302                              | <a href="#">NPC-A-7; bone marrow stromal cell antigen 2</a>                                               | 2.93       |
| ILMN_13405                              | <a href="#">RAP1 GTPase activating protein</a>                                                            | 2.69       |
| ILMN_23476                              | <a href="#">S100 calcium binding protein P</a>                                                            | -3.69      |
| ILMN_10011                              | <a href="#">SMAD family member 7</a>                                                                      | -2.23      |
| ILMN_20610                              | <a href="#">TBC1 domain family, member 15</a>                                                             | 2.47       |
| ILMN_3919                               | <a href="#">TBC1 domain family, member 19</a>                                                             | -2.70      |
| ILMN_1046                               | <a href="#">TIMP metalloproteinase inhibitor 2</a>                                                        | 4.25       |
| ILMN_23732                              | <a href="#">actin filament associated protein 1-like 2</a>                                                | 2.07       |
| ILMN_23272                              | <a href="#">amyloid beta (A4) precursor protein</a>                                                       | 2.19       |
| ILMN_27187                              | <a href="#">bone morphogenetic protein 4</a>                                                              | -3.20      |
| ILMN_7507, ILMN_28609                   | <a href="#">brain-derived neurotrophic factor</a>                                                         | 7.39       |
| ILMN_1624                               | <a href="#">caveolin 1, caveolae protein, 22kDa</a>                                                       | 3.05       |
| ILMN_5108                               | <a href="#">caveolin 2</a>                                                                                | 2.86       |
| ILMN_2442                               | <a href="#">chromosome 5 open reading frame 13</a>                                                        | 2.21       |
| ILMN_20121                              | <a href="#">cyclin-dependent kinase inhibitor 2B (p15, inhibits CDK4)</a>                                 | -3.06      |
| ILMN_16536                              | <a href="#">cytohesin 4</a>                                                                               | 2.15       |
| ILMN_27871                              | <a href="#">dedicator of cytokinesis 7</a>                                                                | -22.54     |
| ILMN_5440                               | <a href="#">dual specificity phosphatase 6</a>                                                            | -5.84      |
| ILMN_10721                              | <a href="#">early growth response 2</a>                                                                   | -2.67      |
| ILMN_25740                              | <a href="#">enhancer of zeste homolog 2 (Drosophila)</a>                                                  | -2.37      |

| Regulation of Cell Communication ( <i>Continued</i> ) |                                                                                                                                                               |                   |
|-------------------------------------------------------|---------------------------------------------------------------------------------------------------------------------------------------------------------------|-------------------|
| Genbank Accession no.                                 | Protein Name                                                                                                                                                  | Ave Fold $\Delta$ |
| ILMN_15615                                            | <a href="#">epidermal growth factor receptor (erythroblastic leukemia viral (v-erb-b) oncogene homolog, avian)</a>                                            | 2.23              |
| ILMN_17131                                            | <a href="#">epiregulin</a>                                                                                                                                    | -2.63             |
| ILMN_18897                                            | <a href="#">fibroblast growth factor 19</a>                                                                                                                   | -2.23             |
| ILMN_1771                                             | <a href="#">fibroblast growth factor 9 (glia-activating factor)</a>                                                                                           | -3.80             |
| ILMN_13466                                            | <a href="#">glutamate receptor, ionotropic, N-methyl D-aspartate 2C</a>                                                                                       | -2.38             |
| ILMN_22730,                                           |                                                                                                                                                               |                   |
| ILMN_11197                                            | <a href="#">glutaredoxin 2</a>                                                                                                                                | -2.11             |
| ILMN_22105                                            | <a href="#">guanine nucleotide binding protein (G protein), gamma 7</a>                                                                                       | 2.02              |
| ILMN_18432                                            | <a href="#">insulin receptor substrate 1</a>                                                                                                                  | -2.23             |
| ILMN_25529                                            | <a href="#">insulin-like growth factor binding protein 3</a>                                                                                                  | 3.05              |
| ILMN_12662                                            | <a href="#">integrin, alpha 2 (CD49B, alpha 2 subunit of VLA-2 receptor)</a>                                                                                  | -4.25             |
| ILMN_11560                                            | <a href="#">kallikrein-related peptidase 6</a>                                                                                                                | 7.71              |
|                                                       | <a href="#">membrane associated guanylate kinase, WW and PDZ domain containing 1; CNKSR family member 3</a>                                                   | -2.08             |
| ILMN_13886                                            |                                                                                                                                                               |                   |
| ILMN_28251, ILMN_9993                                 | <a href="#">microtubule-associated protein 1B</a>                                                                                                             | 3.00              |
| ILMN_3874                                             | <a href="#">mitogen-activated protein kinase kinase kinase 5</a>                                                                                              | -2.03             |
| ILMN_10246                                            | <a href="#">mitogen-activated protein kinase kinase kinase 5</a>                                                                                              | 2.37              |
| ILMN_26971                                            | <a href="#">neuronal guanine nucleotide exchange factor</a>                                                                                                   | 2.17              |
| ILMN_10519                                            | <a href="#">nuclear receptor coactivator 3</a>                                                                                                                | 2.17              |
| ILMN_17074                                            | <a href="#">ovo-like 2 (Drosophila)</a>                                                                                                                       | -2.45             |
| ILMN_3538                                             | <a href="#">phosphatidic acid phosphatase type 2B</a>                                                                                                         | 2.00              |
| ILMN_1289                                             | <a href="#">plasminogen activator, tissue</a>                                                                                                                 | -6.39             |
| ILMN_28109                                            | <a href="#">pleckstrin homology domain containing, family G (with RhoGef domain) member 3</a>                                                                 | 2.03              |
| ILMN_15492                                            | <a href="#">proprotein convertase subtilisin/kexin type 9</a>                                                                                                 | 2.02              |
|                                                       | <a href="#">prostaglandin-endoperoxide synthase 2 (prostaglandin G/H synthase and cyclooxygenase)</a>                                                         | -2.21             |
| ILMN_29986                                            |                                                                                                                                                               |                   |
| ILMN_18896                                            | <a href="#">protein tyrosine phosphatase, receptor type, F</a>                                                                                                | 2.51              |
| ILMN_11345                                            | <a href="#">signal-induced proliferation-associated 1 like 2</a>                                                                                              | -5.50             |
|                                                       | <a href="#">similar to transducin-like enhancer of split 1 (E(sp1) homolog, Drosophila); transducin-like enhancer of split 1 (E(sp1) homolog, Drosophila)</a> | 2.33              |
| ILMN_10669                                            |                                                                                                                                                               |                   |
| ILMN_17250                                            | <a href="#">solute carrier family 1 (glial high affinity glutamate transporter), member 3</a>                                                                 | 2.53              |
| ILMN_5176                                             | <a href="#">solute carrier family 44, member 2</a>                                                                                                            | 2.28              |
| ILMN_4882                                             | <a href="#">thrombospondin 1</a>                                                                                                                              | 2.33              |
|                                                       | <a href="#">transglutaminase 2 (C polypeptide, protein-glutamine-gamma-glutamyltransferase)</a>                                                               | 3.48              |
| ILMN_7641                                             |                                                                                                                                                               |                   |
| ILMN_24479                                            | <a href="#">tripartite motif-containing 24</a>                                                                                                                | 2.29              |
| ILMN_2873                                             | <a href="#">ubiquitin specific peptidase 46</a>                                                                                                               | -2.17             |

| Regulation of Cell Proliferation |                                                                                                                                                                             |                   |
|----------------------------------|-----------------------------------------------------------------------------------------------------------------------------------------------------------------------------|-------------------|
| Genbank Accession no.            | Protein Name                                                                                                                                                                | Ave Fold $\Delta$ |
| ILMN_24441                       | <a href="#">CD33 molecule</a>                                                                                                                                               | -7.92             |
| ILMN_22634                       | <a href="#">CD47 molecule</a>                                                                                                                                               | 2.13              |
| ILMN_1724                        | <a href="#">D site of albumin promoter (albumin D-box) binding protein</a>                                                                                                  | 3.16              |
| ILMN_5586                        | <a href="#">KIT ligand</a>                                                                                                                                                  | -2.57             |
| ILMN_1046                        | <a href="#">TIMP metalloproteinase inhibitor 2</a>                                                                                                                          | 4.25              |
| ILMN_27187                       | <a href="#">bone morphogenetic protein 4</a>                                                                                                                                | -3.20             |
| ILMN_7507, ILMN_28609            | <a href="#">brain-derived neurotrophic factor</a>                                                                                                                           | 7.39              |
| ILMN_1624                        | <a href="#">caveolin 1, caveolae protein, 22kDa</a>                                                                                                                         | 3.05              |
| ILMN_5108                        | <a href="#">caveolin 2</a>                                                                                                                                                  | 2.86              |
| ILMN_3062                        | <a href="#">cyclin-dependent kinase 6</a>                                                                                                                                   | -2.36             |
| ILMN_2684, ILMN_30355            | <a href="#">cyclin-dependent kinase inhibitor 2A (melanoma, p16, inhibits CDK4)</a>                                                                                         | -2.52             |
| ILMN_20121                       | <a href="#">cyclin-dependent kinase inhibitor 2B (p15, inhibits CDK4)</a>                                                                                                   | -3.06             |
| ILMN_29728                       | <a href="#">cysteine-rich protein 2</a>                                                                                                                                     | -3.67             |
| ILMN_26123                       | <a href="#">ecotropic viral integration site 1</a>                                                                                                                          | 2.82              |
| ILMN_15615                       | <a href="#">epidermal growth factor receptor (erythroblastic leukemia viral (v-erb-b) oncogene homolog, avian)</a>                                                          | 2.23              |
| ILMN_17131                       | <a href="#">epiregulin</a>                                                                                                                                                  | -2.63             |
| ILMN_12939                       | <a href="#">fatty acid binding protein 6, ileal</a>                                                                                                                         | 5.07              |
| ILMN_11546                       | <a href="#">ferritin, heavy polypeptide 1; ferritin, heavy polypeptide-like 16; similar to ferritin, heavy polypeptide 1; ferritin, heavy polypeptide-like 3 pseudogene</a> | 2.05              |
| ILMN_1771                        | <a href="#">fibroblast growth factor 9 (glia-activating factor)</a>                                                                                                         | -3.80             |
| ILMN_9313                        | <a href="#">fibroblast growth factor binding protein 1</a>                                                                                                                  | 2.65              |
| ILMN_13020                       | <a href="#">heparin-binding EGF-like growth factor</a>                                                                                                                      | -2.78             |
| ILMN_18432                       | <a href="#">insulin receptor substrate 1</a>                                                                                                                                | -2.23             |
| ILMN_14503                       | <a href="#">insulin receptor substrate 2</a>                                                                                                                                | 2.33              |
| ILMN_25529                       | <a href="#">insulin-like growth factor binding protein 3</a>                                                                                                                | 3.05              |
| ILMN_5216                        | <a href="#">insulin-like growth factor binding protein 6</a>                                                                                                                | 3.19              |
| ILMN_12662                       | <a href="#">integrin, alpha 2 (CD49B, alpha 2 subunit of VLA-2 receptor)</a>                                                                                                | -4.25             |
| ILMN_2247                        | <a href="#">interleukin 8</a>                                                                                                                                               | -4.35             |
| ILMN_7322                        | <a href="#">laminin, beta 1</a>                                                                                                                                             | -4.95             |
| ILMN_9188                        | <a href="#">matrix metalloproteinase 7 (matrilysin, uterine)</a>                                                                                                            | 2.08              |
| ILMN_137891                      | <a href="#">msh homeobox 1</a>                                                                                                                                              | -3.03             |
| ILMN_17483                       | <a href="#">neuropilin 1</a>                                                                                                                                                | -2.77             |
| ILMN_17074                       | <a href="#">ovo-like 2 (Drosophila)</a>                                                                                                                                     | -2.45             |
| ILMN_19894                       | <a href="#">parathyroid hormone 1 receptor</a>                                                                                                                              | 2.06              |
| ILMN_7980                        | <a href="#">peroxisome proliferator-activated receptor gamma</a>                                                                                                            | -2.01             |
| ILMN_24167                       | <a href="#">plasminogen activator, urokinase</a>                                                                                                                            | 2.11              |
| ILMN_27588                       | <a href="#">pre-B-cell leukemia homeobox 1</a>                                                                                                                              | 2.33              |
| ILMN_2778                        | <a href="#">prostaglandin E synthase</a>                                                                                                                                    | 2.62              |
| ILMN_3001                        | <a href="#">prostaglandin-endoperoxide synthase 1 (prostaglandin G/H synthase and cyclooxygenase)</a>                                                                       | 2.75              |
| ILMN_29986                       | <a href="#">prostaglandin-endoperoxide synthase 2 (prostaglandin G/H synthase and cyclooxygenase)</a>                                                                       | -2.21             |
| ILMN_18896                       | <a href="#">protein tyrosine phosphatase, receptor type, F</a>                                                                                                              | 2.51              |
| ILMN_17676                       | <a href="#">tensin 3</a>                                                                                                                                                    | 2.33              |
| ILMN_11441                       | <a href="#">tetraspanin 31</a>                                                                                                                                              | 2.03              |

| Regulation of Cell Proliferation (Continued) |                                                                                                                 |            |
|----------------------------------------------|-----------------------------------------------------------------------------------------------------------------|------------|
| Genbank Accession no.                        | Protein Name                                                                                                    | Ave Fold Δ |
| ILMN_4882                                    | <a href="#">thrombospondin 1</a>                                                                                | 2.33       |
| ILMN_7641                                    | <a href="#">transglutaminase 2 (C polypeptide, protein-glutamine-gamma-glutamyltransferase)</a>                 | 3.48       |
| ILMN_24479                                   | <a href="#">tripartite motif-containing 24</a>                                                                  | 2.29       |
| ILMN_25430                                   | <a href="#">tryptophanyl-tRNA synthetase</a>                                                                    | -4.74      |
| ILMN_5708                                    | <a href="#">v-ets erythroblastosis virus E26 oncogene homolog 1 (avian)</a>                                     | 2.80       |
| Lipid Metabolic Process                      |                                                                                                                 |            |
| Genbank Accession no.                        | Protein Name                                                                                                    | Ave Fold Δ |
| ILMN_14756                                   | <a href="#">1-acylglycerol-3-phosphate O-acyltransferase 4 (lysophosphatidic acid acyltransferase, delta)</a>   | 2.28       |
| ILMN_9737                                    | <a href="#">1-acylglycerol-3-phosphate O-acyltransferase 5 (lysophosphatidic acid acyltransferase, epsilon)</a> | -2.19      |
| ILMN_21049                                   | <a href="#">ATP-binding cassette, sub-family A (ABC1), member 1</a>                                             | 5.28       |
| ILMN_22988                                   | <a href="#">DDHD domain containing 2</a>                                                                        | 2.19       |
| ILMN_30044                                   | <a href="#">acetyl-Coenzyme A acyltransferase 1</a>                                                             | 2.45       |
| ILMN_6029, ILMN_6741                         | <a href="#">acyl-CoA synthetase long-chain family member 5</a>                                                  | -2.64      |
| ILMN_25111                                   | <a href="#">aldehyde dehydrogenase 1 family, member A3</a>                                                      | 3.82       |
| ILMN_26797                                   | <a href="#">aldehyde dehydrogenase 3 family, member B1</a>                                                      | 2.58       |
| ILMN_1624                                    | <a href="#">caveolin 1, caveolae protein, 22kDa</a>                                                             | 3.05       |
| ILMN_24076                                   | <a href="#">choline phosphotransferase 1</a>                                                                    | -2.11      |
| ILMN_21296                                   | <a href="#">cytochrome P450, family 24, subfamily A, polypeptide 1</a>                                          | -17.96     |
| ILMN_20221                                   | <a href="#">cytochrome P450, family 4, subfamily F, polypeptide 3</a>                                           | 2.17       |
| ILMN_12939                                   | <a href="#">fatty acid binding protein 6, ileal</a>                                                             | 5.07       |
| ILMN_12496                                   | <a href="#">insulin induced gene 1</a>                                                                          | 4.12       |
| ILMN_28744                                   | <a href="#">lipin 1</a>                                                                                         | 3.48       |
| ILMN_2030                                    | <a href="#">low density lipoprotein receptor-related protein 8, apolipoprotein e receptor</a>                   | 2.98       |
| ILMN_17785                                   | <a href="#">membrane bound O-acyltransferase domain containing 2</a>                                            | 2.45       |
| ILMN_25425                                   | <a href="#">nephronophthisis 3 (adolescent); acyl-Coenzyme A dehydrogenase family, member 11</a>                | -2.13      |
| ILMN_7980                                    | <a href="#">peroxisome proliferator-activated receptor gamma</a>                                                | -2.01      |
| ILMN_3538                                    | <a href="#">phosphatidic acid phosphatase type 2B</a>                                                           | 2.00       |
| ILMN_5923                                    | <a href="#">phosphoinositide-3-kinase, regulatory subunit 1 (alpha)</a>                                         | 2.62       |
| ILMN_27588                                   | <a href="#">pre-B-cell leukemia homeobox 1</a>                                                                  | 2.33       |
| ILMN_15492                                   | <a href="#">proprotein convertase subtilisin/kexin type 9</a>                                                   | 2.02       |
| ILMN_2778                                    | <a href="#">prostaglandin E synthase</a>                                                                        | 2.62       |
| ILMN_3001                                    | <a href="#">prostaglandin-endoperoxide synthase 1 (prostaglandin G/H synthase and cyclooxygenase)</a>           | 2.75       |
| ILMN_29986                                   | <a href="#">prostaglandin-endoperoxide synthase 2 (prostaglandin G/H synthase and cyclooxygenase)</a>           | -2.21      |
| ILMN_671                                     | <a href="#">protein kinase, AMP-activated, gamma 2 non-catalytic subunit</a>                                    | 2.02       |
| ILMN_11289                                   | <a href="#">retinol binding protein 1, cellular</a>                                                             | -2.21      |
| ILMN_521                                     | <a href="#">squalene epoxidase</a>                                                                              | 2.11       |

| Cell Motility         |                                                                                  |                   |
|-----------------------|----------------------------------------------------------------------------------|-------------------|
| Genbank Accession no. | Protein Name                                                                     | Ave Fold $\Delta$ |
| ILMN_17477            | <a href="#">AT rich interactive domain 5B (MRF1-like)</a>                        | 2.48              |
| ILMN_5586             | <a href="#">KIT ligand</a>                                                       | -2.57             |
| ILMN_23476            | <a href="#">S100 calcium binding protein P</a>                                   | -3.69             |
| ILMN_15630            | <a href="#">SATB homeobox 2</a>                                                  | -2.25             |
| ILMN_5108             | <a href="#">caveolin 2</a>                                                       | 2.86              |
| ILMN_7282             | <a href="#">collagen triple helix repeat containing 1</a>                        | -5.09             |
| ILMN_139036           | <a href="#">collagen, type V, alpha 1</a>                                        | -2.35             |
| ILMN_3374             | <a href="#">connective tissue growth factor</a>                                  | 3.35              |
| ILMN_13178            | <a href="#">dynein, axonemal, heavy chain 2</a>                                  | 3.69              |
| ILMN_18897            | <a href="#">fibroblast growth factor 19</a>                                      | -2.23             |
| ILMN_23624            | <a href="#">forkhead box C1</a>                                                  | -3.12             |
| ILMN_13020            | <a href="#">heparin-binding EGF-like growth factor</a>                           | -2.78             |
| ILMN_2247             | <a href="#">interleukin 8</a>                                                    | -4.35             |
|                       | <a href="#">low density lipoprotein receptor-related protein 8,</a>              |                   |
| ILMN_2030             | <a href="#">apolipoprotein e receptor</a>                                        | 2.98              |
| ILMN_17483            | <a href="#">neuropilin 1</a>                                                     | -2.77             |
| ILMN_7200             | <a href="#">nuclear receptor subfamily 2, group F, member 1</a>                  | -6.66             |
| ILMN_28405            | <a href="#">nuclear receptor subfamily 4, group A, member 2</a>                  | -2.58             |
| ILMN_17074            | <a href="#">ovo-like 2 (Drosophila)</a>                                          | -2.45             |
| ILMN_3538             | <a href="#">phosphatidic acid phosphatase type 2B</a>                            | 2.00              |
| ILMN_1289             | <a href="#">plasminogen activator, tissue</a>                                    | -6.39             |
| ILMN_24167            | <a href="#">plasminogen activator, urokinase</a>                                 | 2.11              |
| ILMN_12926            | <a href="#">poly (ADP-ribose) polymerase family, member 9</a>                    | 2.25              |
|                       | <a href="#">sema domain, immunoglobulin domain (Ig), short basic domain,</a>     |                   |
| ILMN_29382            | <a href="#">secreted, (semaphorin) 3C</a>                                        | 2.03              |
| ILMN_28730            | <a href="#">similar to protein kinase, DNA-activated, catalytic polypeptide;</a> |                   |
|                       | <a href="#">protein kinase, DNA-activated, catalytic polypeptide</a>             | 2.39              |
| ILMN_17676            | <a href="#">tensin 3</a>                                                         | 2.33              |
| ILMN_4882             | <a href="#">thrombospondin 1</a>                                                 | 2.33              |
| ILMN_9324             | <a href="#">twist homolog 1 (Drosophila)</a>                                     | 2.20              |
| ILMN_5708             | <a href="#">v-ets erythroblastosis virus E26 oncogene homolog 1 (avian)</a>      | 2.80              |
| ILMN_25778            | <a href="#">versican</a>                                                         | 2.82              |

| Regulation of Cell Death |                                                                                 |                   |
|--------------------------|---------------------------------------------------------------------------------|-------------------|
| Genbank Accession no.    | Protein Name                                                                    | Ave Fold $\Delta$ |
| ILMN_25111               | <a href="#">aldehyde dehydrogenase 1 family, member A3</a>                      | 3.82              |
| ILMN_23272               | <a href="#">amyloid beta (A4) precursor protein</a>                             | 2.19              |
| ILMN_20440               | <a href="#">angiopoietin-like 4</a>                                             | -2.05             |
| ILMN_3897                | <a href="#">baculoviral IAP repeat-containing 3</a>                             | 2.61              |
| ILMN_27187               | <a href="#">bone morphogenetic protein 4</a>                                    | -3.20             |
| ILMN_7507, ILMN_28609    | <a href="#">brain-derived neurotrophic factor</a>                               | 7.39              |
| ILMN_7434                | <a href="#">caspase 4, apoptosis-related cysteine peptidase</a>                 | 2.41              |
|                          | <a href="#">cyclin-dependent kinase inhibitor 2A (melanoma, p16, inhibits</a>   |                   |
| ILMN_2684, ILMN_30355    | <a href="#">CDK4)</a>                                                           | -2.52             |
| ILMN_15615               | <a href="#">epidermal growth factor receptor (erythroblastic leukemia viral</a> |                   |
|                          | <a href="#">(v-erb-b) oncogene homolog, avian)</a>                              | 2.23              |
| ILMN_23624               | <a href="#">forkhead box C1</a>                                                 | -3.12             |



| Regulation of Cell Death (Continued) |                                                                                                                                       |                   |
|--------------------------------------|---------------------------------------------------------------------------------------------------------------------------------------|-------------------|
| Genbank Accession no.                | Protein Name                                                                                                                          | Ave Fold $\Delta$ |
| ILMN_6829                            | <a href="#">inhibitor of DNA binding 3, dominant negative helix-loop-helix protein</a>                                                | -3.22             |
| ILMN_25529                           | <a href="#">insulin-like growth factor binding protein 3</a>                                                                          | 3.05              |
| ILMN_30275                           | <a href="#">interferon induced with helicase C domain 1</a>                                                                           | 2.02              |
| ILMN_3874                            | <a href="#">mitogen-activated protein kinase kinase kinase 5</a>                                                                      | -2.03             |
| ILMN_137891                          | <a href="#">msh homeobox 1</a>                                                                                                        | -3.03             |
| ILMN_25768                           | <a href="#">mutS homolog 6 (E. coli)</a>                                                                                              | 2.08              |
| ILMN_26971                           | <a href="#">neuronal guanine nucleotide exchange factor</a>                                                                           | 2.17              |
| ILMN_28405                           | <a href="#">nuclear receptor subfamily 4, group A, member 2</a>                                                                       | -2.58             |
| ILMN_15492                           | <a href="#">proprotein convertase subtilisin/kexin type 9</a>                                                                         | 2.02              |
| ILMN_29986                           | <a href="#">prostaglandin-endoperoxide synthase 2 (prostaglandin G/H synthase and cyclooxygenase)</a>                                 | -2.21             |
| ILMN_18896                           | <a href="#">protein tyrosine phosphatase, receptor type, F</a>                                                                        | 2.51              |
| ILMN_26935                           | <a href="#">serine/threonine kinase 3 (STE20 homolog, yeast)</a>                                                                      | 2.11              |
| ILMN_28730                           | <a href="#">similar to protein kinase, DNA-activated, catalytic polypeptide; protein kinase, DNA-activated, catalytic polypeptide</a> | 2.39              |
| ILMN_11307                           | <a href="#">sortilin 1</a>                                                                                                            | -2.03             |
| ILMN_4882                            | <a href="#">thrombospondin 1</a>                                                                                                      | 2.33              |
| ILMN_7641                            | <a href="#">transglutaminase 2 (C polypeptide, protein-glutamine-gamma-glutamyltransferase)</a>                                       | 3.48              |
| ILMN_5708                            | <a href="#">v-ets erythroblastosis virus E26 oncogene homolog 1 (avian)</a>                                                           | 2.80              |
| Cell Cycle Process                   |                                                                                                                                       |                   |
| Genbank Accession no.                | Protein Name                                                                                                                          | Ave Fold $\Delta$ |
| ILMN_17286                           | <a href="#">LFNG O-fucosylpeptide 3-beta-N-acetylglucosaminyltransferase</a>                                                          | 2.58              |
| ILMN_19136                           | <a href="#">RAN, member RAS oncogene family</a>                                                                                       | -2.69             |
| ILMN_23272                           | <a href="#">amyloid beta (A4) precursor protein</a>                                                                                   | 2.19              |
| ILMN_3062                            | <a href="#">cyclin-dependent kinase 6</a>                                                                                             | -2.36             |
| ILMN_2684, ILMN_30355                | <a href="#">cyclin-dependent kinase inhibitor 2A (melanoma, p16, inhibits CDK4)</a>                                                   | -2.52             |
| ILMN_20121                           | <a href="#">cyclin-dependent kinase inhibitor 2B (p15, inhibits CDK4)</a>                                                             | -3.06             |
| ILMN_15615                           | <a href="#">epidermal growth factor receptor (erythroblastic leukemia viral (v-erb-b) oncogene homolog, avian)</a>                    | 2.23              |
| ILMN_17131                           | <a href="#">epiregulin</a>                                                                                                            | -2.63             |
| ILMN_2247                            | <a href="#">interleukin 8</a>                                                                                                         | -4.35             |
| ILMN_3286                            | <a href="#">microtubule-actin crosslinking factor 1</a>                                                                               | -2.12             |
| ILMN_25768                           | <a href="#">mutS homolog 6 (E. coli)</a>                                                                                              | 2.08              |
| ILMN_19658                           | <a href="#">ras homolog gene family, member U</a>                                                                                     | -3.21             |
| ILMN_7290                            | <a href="#">sestrin 2</a>                                                                                                             | -2.07             |
| ILMN_4882                            | <a href="#">thrombospondin 1</a>                                                                                                      | 2.33              |

| Regulation of Cell Adhesion     |                                                                                                                    |                   |
|---------------------------------|--------------------------------------------------------------------------------------------------------------------|-------------------|
| Genbank Accession no.           | Protein Name                                                                                                       | Ave Fold $\Delta$ |
| ILMN_22634                      | <a href="#">CD47 molecule</a>                                                                                      | 2.13              |
| ILMN_9982                       | <a href="#">FXD domain containing ion transport regulator 5</a>                                                    | 2.63              |
| ILMN_9074                       | <a href="#">Rho GDP dissociation inhibitor (GDI) beta</a>                                                          | 5.15              |
| ILMN_10011                      | <a href="#">SMAD family member 7</a>                                                                               | -2.23             |
| ILMN_3062                       | <a href="#">cyclin-dependent kinase 6</a>                                                                          | -2.36             |
| ILMN_2684, ILMN_30355           | <a href="#">cyclin-dependent kinase inhibitor 2A (melanoma, p16, inhibits CDK4)</a>                                | -2.52             |
| ILMN_20248                      | <a href="#">dipeptidyl-peptidase 4</a>                                                                             | 2.94              |
| ILMN_12662                      | <a href="#">integrin, alpha 2 (CD49B, alpha 2 subunit of VLA-2 receptor)</a>                                       | -4.25             |
| ILMN_2247                       | <a href="#">interleukin 8</a>                                                                                      | -4.35             |
| ILMN_4021                       | <a href="#">laminin, alpha 4</a>                                                                                   | -2.48             |
| ILMN_5923                       | <a href="#">phosphoinositide-3-kinase, regulatory subunit 1 (alpha)</a>                                            | 2.62              |
| ILMN_4882                       | <a href="#">thrombospondin 1</a>                                                                                   | 2.33              |
| ILMN_7641                       | <a href="#">transglutaminase 2 (C polypeptide, protein-glutamine-gamma-glutamyltransferase)</a>                    | 3.48              |
| Regulation of Gland Development |                                                                                                                    |                   |
| Genbank Accession no.           | Protein Name                                                                                                       | Ave Fold $\Delta$ |
| ILMN_13615                      | <a href="#">E74-like factor 3 (ets domain transcription factor, epithelial-specific)</a>                           | 2.80              |
| ILMN_25111                      | <a href="#">aldehyde dehydrogenase 1 family, member A3</a>                                                         | 3.82              |
| ILMN_27187                      | <a href="#">bone morphogenetic protein 4</a>                                                                       | -3.20             |
| ILMN_1624                       | <a href="#">caveolin 1, caveolae protein, 22kDa</a>                                                                | 3.05              |
| ILMN_5108                       | <a href="#">caveolin 2</a>                                                                                         | 2.86              |
| ILMN_15615                      | <a href="#">epidermal growth factor receptor (erythroblastic leukemia viral (v-erb-b) oncogene homolog, avian)</a> | 2.23              |
| ILMN_23624                      | <a href="#">forkhead box C1</a>                                                                                    | -3.12             |
| ILMN_18432                      | <a href="#">insulin receptor substrate 1</a>                                                                       | -2.23             |
| ILMN_14503                      | <a href="#">insulin receptor substrate 2</a>                                                                       | 2.33              |
| ILMN_12662                      | <a href="#">integrin, alpha 2 (CD49B, alpha 2 subunit of VLA-2 receptor)</a>                                       | -4.25             |
| ILMN_27588                      | <a href="#">pre-B-cell leukemia homeobox 1</a>                                                                     | 2.33              |
| ILMN_21728                      | <a href="#">wingless-type MMTV integration site family, member 3A</a>                                              | -2.25             |
| Response to Hypoxia             |                                                                                                                    |                   |
| Genbank Accession no.           | Protein Name                                                                                                       | Ave Fold $\Delta$ |
| ILMN_25542,                     |                                                                                                                    |                   |
| ILMN_10855                      | <a href="#">ATPase, Na<sup>+</sup>/K<sup>+</sup> transporting, beta 1 polypeptide</a>                              | 3.25              |
| ILMN_20440                      | <a href="#">angiopoietin-like 4</a>                                                                                | -2.05             |
| ILMN_1624                       | <a href="#">caveolin 1, caveolae protein, 22kDa</a>                                                                | 3.05              |
| ILMN_20248                      | <a href="#">dipeptidyl-peptidase 4</a>                                                                             | 2.94              |
| ILMN_12662                      | <a href="#">integrin, alpha 2 (CD49B, alpha 2 subunit of VLA-2 receptor)</a>                                       | -4.25             |
| ILMN_28405                      | <a href="#">nuclear receptor subfamily 4, group A, member 2</a>                                                    | -2.58             |
| ILMN_1289                       | <a href="#">plasminogen activator, tissue</a>                                                                      | -6.39             |
| ILMN_24167                      | <a href="#">plasminogen activator, urokinase</a>                                                                   | 2.11              |
| ILMN_4882                       | <a href="#">thrombospondin 1</a>                                                                                   | 2.33              |

| Regulation of Cytoskeleton Organization      |                                                                                    |                   |
|----------------------------------------------|------------------------------------------------------------------------------------|-------------------|
| Genbank Accession no.                        | Protein Name                                                                       | Ave Fold $\Delta$ |
| ILMN_6603                                    | <a href="#">LIM domain and actin binding 1</a>                                     | 2.18              |
| ILMN_1624                                    | <a href="#">caveolin 1, caveolae protein, 22kDa</a>                                | 3.05              |
| ILMN_5108                                    | <a href="#">caveolin 2</a>                                                         | 2.86              |
| ILMN_3286                                    | <a href="#">microtubule-actin crosslinking factor 1</a>                            | -2.12             |
| ILMN_28251, ILMN_9993                        | <a href="#">microtubule-associated protein 1B</a>                                  | 3.00              |
| ILMN_12193                                   | <a href="#">thymosin beta 15a; thymosin beta 15B</a>                               | 2.04              |
| Positive regulation of Immune System Process |                                                                                    |                   |
| Genbank Accession no.                        | Protein Name                                                                       | Ave Fold $\Delta$ |
| ILMN_22634                                   | <a href="#">CD47 molecule</a>                                                      | 2.13              |
| ILMN_17131                                   | <a href="#">epiregulin</a>                                                         | -2.63             |
| ILMN_12662                                   | <a href="#">integrin, alpha 2 (CD49B, alpha 2 subunit of VLA-2 receptor)</a>       | -4.25             |
| ILMN_29874                                   | <a href="#">killer cell lectin-like receptor subfamily K, member 1</a>             | -2.02             |
| ILMN_4882                                    | <a href="#">thrombospondin 1</a>                                                   | 2.33              |
| Regulation of Angiogenesis                   |                                                                                    |                   |
| Genbank Accession no.                        | Protein Name                                                                       | Ave Fold $\Delta$ |
| ILMN_18802                                   | <a href="#">angiopoietin 2</a>                                                     | -40.43            |
| ILMN_20440                                   | <a href="#">angiopoietin-like 4</a>                                                | -2.05             |
| ILMN_4882                                    | <a href="#">thrombospondin 1</a>                                                   | 2.33              |
| ILMN_25430                                   | <a href="#">tryptophanyl-tRNA synthetase</a>                                       | -4.74             |
| Regulation of Exocytosis                     |                                                                                    |                   |
| Genbank Accession no.                        | Protein Name                                                                       | Ave Fold $\Delta$ |
| ILMN_29025                                   | <a href="#">RAB3B, member RAS oncogene family</a>                                  | -2.52             |
| ILMN_14093                                   | <a href="#">synaptotagmin I</a>                                                    | -2.40             |
| ILMN_29216                                   | <a href="#">transient receptor potential cation channel, subfamily V, member 6</a> | -3.17             |
